# Supplementary material for: Spray Drying Is a Viable Technology for the Preservation of Recombinant Proteins in Microalgae
Source: MDPI journal article supplement (doi:10.3390/microorganisms11020512), 2023-02-17
Supplement: s1 [file s1]

## Supplementary Figure S1: Sequence details of the E2-ecto transgenes

### >DNA sequence of E2-ecto transcriptional unit

aaaacaattattatttttactgcgagcagcttggttattgaaattttatttaaaaaaaaaataa  
aaatttgacaaaaaaaaataaaaaagtttaaattaaaaacactgggaatggttctacatcataa  
aaatcaaaagggttttaaaatcccgacaaaattttaacttttaagagtatgatgtataaaaaaa  
ctatttgctctaattttaataaccatgcatttttttatgaacacataataattaaaagcgttgct  
aatggtgtataataatgtattttattaaattaaataattggttattataaggagaaatccATGAC  
ACCACAAAACATTACTGACTTATGCGCTGAATACCACAACACTCAAATTTACACTTTAAATG  
ACAAAATTTTCTCTTATACAGAATCTTTAGCTGGTAAACGTGAAATGGCAATCATTACTTTT  
AAAAACGGTGCTATTTTCCAAGTTGAAGTACCAGGTTACACAACACATTGATTACAAAAAAA  
AGCTATCGAACGTATGAAAGATACTTTACGTATTGCTTACTTAACTGAAGCTAAAGTTGAAA  
AATTATGTGTATGGAATAACAAAACCTCCACACGCAATTGCTGCTATTTCTATGGCTAATGGT  
GGTGGTGGTAGTGGCGGTGGTGGTAGCGGTGGTGGTGGTTCAGCAGTAAGTGCTTCTCCAGC  
GGCTGTTTATGATACTCAAATTTTAGCTGCTCACGCAGCTGCATCTCCATACCGTGCTTACT  
GTCCTGATTGTGACGGTACTGCATGTATTTCTCCAATTGCAATTGATGAAGTTGTATCATCA  
GGTCTGACCACGTATTACGTATTTCGTGTAGGTTTACAATCTGGTGTAAGTGTAAAGGTGG  
TGCTGCTGGTGAACTTCATTACGTTACTTAGGTCGTGACGGTAAAGTTACGCTGCTGATA  
ACACTCGTTTAGTAGTTCGTACAACCTGCTAAATGTGACGTTTTACAAGCAACAGGTCACTAC  
ATTTTAGCTAGTTGTCCAGAAGGTCAATCAATTACAGTAGCTGCTACATTAGATGGTACTCG  
TCACCAATGTACTACAGTATTCGAACACCAAGTAACTGAAAAATTTACACGTGAACGTTCTA  
AAGGTCACCACTTAAGTGATTTAACTAAAAAATGTACACGTTTCAGTACAACACCAAAAAA  
TCAGCTCCATACTTAGTAGATGTTTACGATGCTTTACCAATTTCTGTAGAAATTTCTACAGT  
AGTTACTTGTAACGATAACCAATGTACTGTACGTGTTTCTCCAGGTACAACGTGAAAATTTG  
ATAAAAAATGTAAAGTGCTGCTCAAGCTACAGTTACTTTACATCTGATTCTCAAACATTT  
ACTTGTGAAGAACCAGTTTTAACTGCTGCTAGTATTACTCAAGGTAAACCACACTTACGTAG  
CTCAATGTTACCATCAGGTGGTAAAGAAGTAAAAGCTCGTATCCCATTTCCATTCCCTCCTG  
AAACAGCAACTTGTCGTGTATCTGTTGCTCCATTACCATCTATCACATATGAAGAATCAGAC  
GTACTATTAGCTGGTACTGCTAAATACCCTGTATTATTAACAACACGTAACCTTGGTTTCCA  
CTCTAACGCAACTTCTGAATGGATTCAAGGTAAATATTTACGTCGTATTCCAGTTACTCCTC  
AAGGTATTGAATTAAGTTGGGGTAACAACGCTCCTTTACACTTCTGGTCATCAGTACGTTAT  
GCTTCAGGTGATGCAGATGCTTATCCATGGGAATTATTAGTTTCATCACACAAAACACCACGG  
TGGTGGTGGTTCTTACCCATACGATGTTCTGACTACGCTTAAtaattttttatttttcatga  
tgtttatgtgaatagcataaacatcggttttttatttttatggtgttttaggttaaatacctaaa  
catcattttacattttttaaaattaagtttctaaagttatcttttggttaaatttgctgtctt  
tataaattacgatgtgccagaaaaataaaatcttagctttttattatagaattttatctttat  
gtattatatttttataagttataataaaaagaaatagtaacataactaaagcggatgta

### Key

- C. reinhardtii promoter and UTR sequences
- Cholera toxin beta
- Flexible GGGGS linker units
- Residues 353-729 from the structural polyprotein of SAV subtype 3 (Genbank Acc. No. AGTT2234)
- HA epitope tag

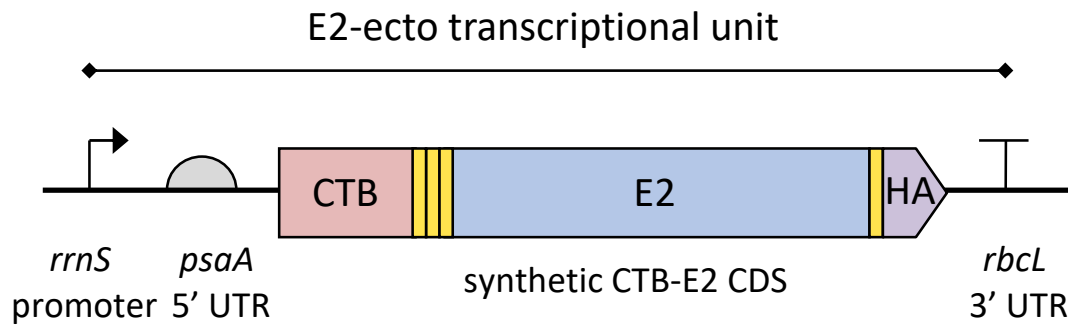

**>Protein sequence of E2-ecto**

MTPQNITDLCAEYHNTQIYTLNDKIFSYTESLAGKREMAIITFKNGAIFQVEVPGSQHIDSQ  
KKAIERMKDTRLRIAYLTEAKVEKLCVWNNKTPHAIAAISMANGGGSGGGSGGGSGGGSAVSAS  
PAAVYDTQILAAHAAASPYRAYCPDCDGTACISPIAIDEVVSSGSDHVLRLRVGSQSGVTAK  
GGAAGETSLRYLGRDGKVHAADNTRLVVRTTAKCDVLQATGHYILASCPEGQSITVAATLDG  
TRHQCTTVFEHQVTEKFTRERSKGHHLSDLTKKCTRFSTTPKKSAPYLVVDYDALPISVEIS  
TVVTCNDNQCTVRVSPGTTVKFDKKCKSAAQATVTFTSDSQFTCEEPVLTAASITQGKPHL  
RSSMLPSGGKEVKARIPFPFPETATCRVSVAPLPSITYEESDVLLAGTAKYPVLLTTRNLG  
FHSNATSEWIQGKYLRRIPVTPQGIELTWGNNAPLHFWSSVRYASGDADAYPWELLVHHTKH  
HGGGGSYPYDVDPDYA
